# Supplementary material
Source: Springer Nature journal article supplement (https://www.springermedizin.de/resource/supplementary/12885_2013_4288_MOESM1_ESM.pdf/9467258)

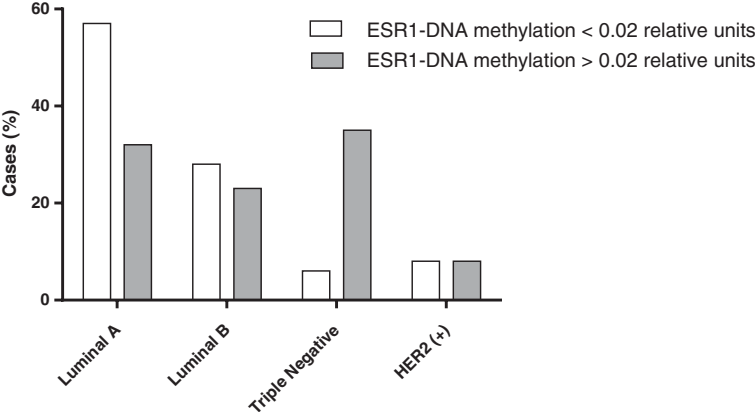

Supplement: MOESM1 [file 9467258]
